# Supplementary material
Source: HighWire-hosted journal article supplement (https://cmaj.ca/highwire/filestream/69264/field_highwire_adjunct_files/0/170817-res-visual-abstract.pdf)
Supplement: 170817-res-visual-abstract.pdf [file 170817-res-visual-abstract.pdf]

# PREDICTORS OF TB IN PEOPLE MIGRATING TO CANADA

## A VISUAL RESEARCH ABSTRACT

### BACKGROUND

- ▶ There is no routine screening for latent tuberculosis (TB) infection in people migrating to Canada even though TB incidence may be high in some groups.

### STUDY

- ▶ Retrospective cohort study of people migrating to British Columbia, who became permanent residents of Canada between 1985 and 2012.

### RESULTS

OVERALL INCIDENCE

**24/100 000**  
person-years  
over the  
29-year study

PEOPLE MIGRATING  
FROM COUNTRIES WITH

**high TB rates**  
( $> 48/100\ 000$  population)

**versus**  
**low TB rates**  
( $< 2/100\ 000$  population)

**21x**  
higher  
incidence  
of TB

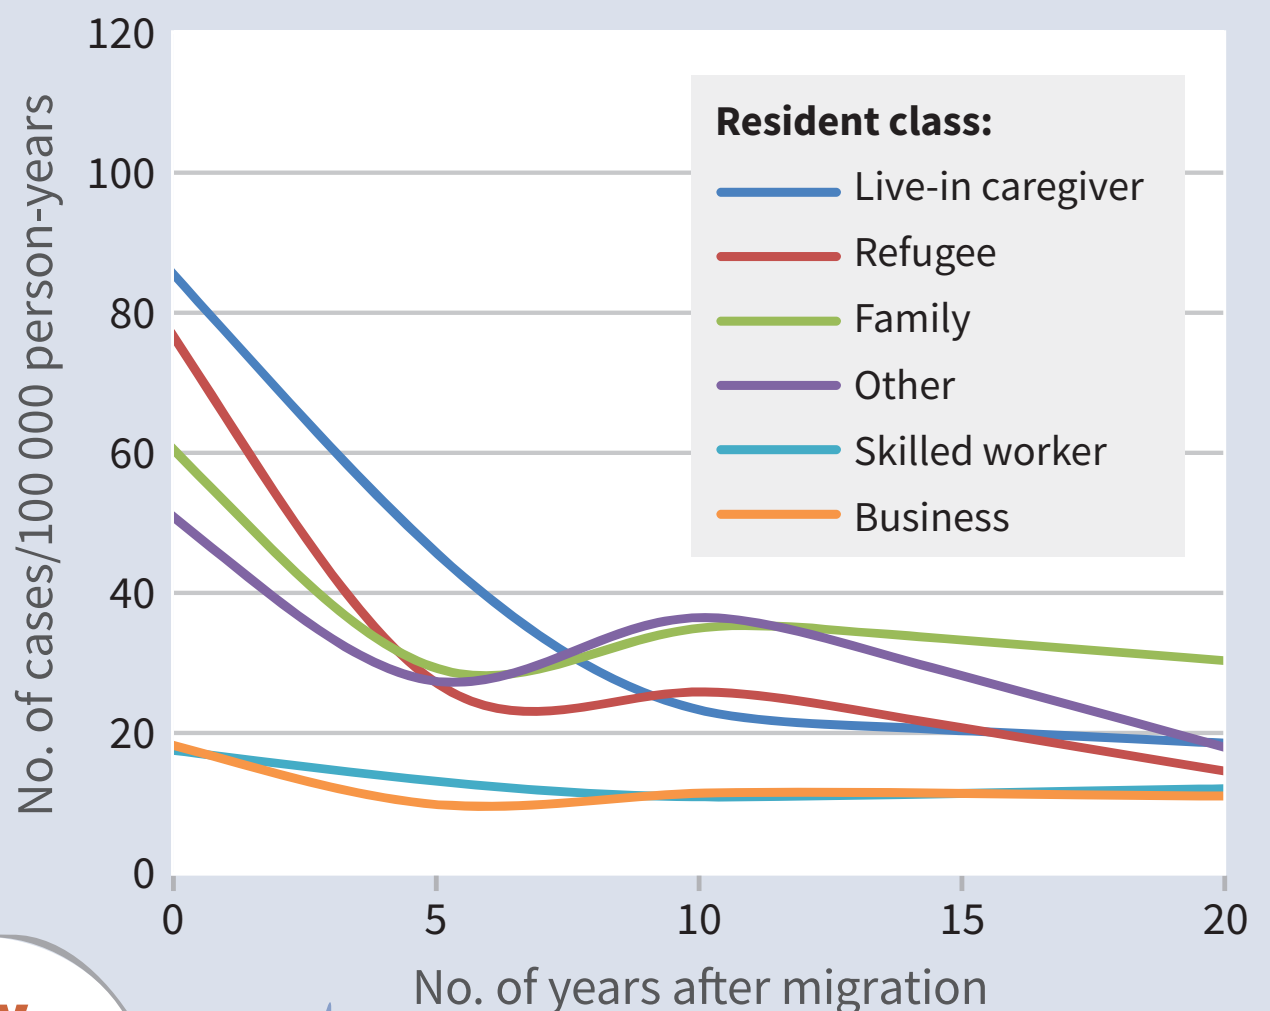

TB incidence declined over the first 5 years but stayed high after 10 years.

### INTERPRETATION

Screening people at highest risk of TB upon arrival in Canada – and treating those who screen positive – could help move the country toward TB elimination.
